# Supplementary material for: Resource polymorphism in European whitefish: Analysis of fatty acid profiles provides more detailed evidence than traditional methods alone
Source: PLoS One. 2019 Aug 20;14(8):e0221338. doi: 10.1371/journal.pone.0221338 (PMC6701781; doi:10.1371/journal.pone.0221338)
Supplement: S3 Table — (see attached Excel sheet): Upper table = Morphological and diet data for each individual fish included in this study; values for diet data represent proportional presence of each prey within the stomach of each individual, based on a point-based method (see: Sample collection and preparation). Lower table = average percentage totals for stomach contents of each study taxon. (XLSX) [file pone.0221338.s003.xlsx]

## Sheet: Sheet1
Lake	Group	Sample code	Total length (cm)	Weight (g)	Sex	Sexual Maturity	GR count	Stomach Fullness	Calanoida	Bosmina	Daphnia	Copepoda	Surface insects	Eurycercus	Chironomid larvae	Pisidium	Megacyclops	Unidentified fish	LSR whitefish	Whitefish unidentified	DR whitefish	Vendace	9-spined stickleback	Trichoptera	SSR whitefish	Burbot	Perch	Ostracoda	Hydracarina	Holopedium	Cyclopoida	Asellus	Valvata/Planorbis
Muddus	Brown trout	14MBT121	55.1	1524.7	1	3		7											7
Muddus	Brown trout	14MBT123	60.5	1715.2	1	7		0
Muddus	Brown trout	14MBT126	47.5	1137.4	2	3		5												0.3	4.7
Paadar	Brown trout	14PBT3	40.1	627.2	1	2		2										2
Paadar	Brown trout	14PBT4	39.3	569.5	2	2		5												5
Paadar	Brown trout	14PBT7	37.5	542.2	1	2		7													7
Inari	Brown trout	09IBT20	49.3	1248.7	1	3		4														4
Inari	Brown trout	09IBT82	50.5	1366.2	1	3		3														2.5	0.5
Inari	Brown trout	09IBT83	47.3	1135.5	2	3		0
Vastus	Brown trout	14VABT122	32.2	336.3	2	2		2																2
Vastus	Brown trout	14VABT123	41.8	700.1	1	2		0
Vastus	Brown trout	14VABT125	33.2	357.4	1	1		0
Ukonjärvi	Brown trout	10UBT9	40.5	731.9	2	3		2															2
Ukonjärvi	Brown trout	10UBT17	50.3	1357.4	2	3		0
Ukonjärvi	Brown trout	10UBT29	43.8	797.5	1	2		6											1			5
Muddus	Pike	14MP125	54.1	972.8	2	4		7																	7
Muddus	Pike	14MP127	55.5	876.6	2	4		0
Muddus	Pike	14MP128	60.5	1230.6	1	4		3													3
Paadar	Pike	14PP1	68.7	1943.8	2	4		0
Paadar	Pike	14PP2	42	441.7	1	2		0
Paadar	Pike	14PP3	35.1	255.7	2	2		1										1
Inari	Pike	09IP13	55.6	1019.9	1	4		6																		6
Inari	Pike	09IP21	53.1	949.6	1	4		9											9
Inari	Pike	09IP26	53.2	803.5	1	4		2															2
Vastus	Pike	14VAP121	66	1840.1	2	4		1												1
Vastus	Pike	14VAP128	56	937.7	2	2		1												1
Vastus	Pike	14VAP130	53.1	879.8	2	4		5											5
Ukonjärvi	Pike	10UP3	47.5	648.9	1	4		3																			3
Ukonjärvi	Pike	10UP4	45.7	513.2	1	4		2										2
Ukonjärvi	Pike	10UP5	41.1	456.4	2	4		0
Vaggatem	Pike	TB39	57.686	974				0.5	0	0	0		0		0	0	0	0					0.5	0				0	0	0	0	0	0
Vaggatem	Pike	TB79	65.4825	1353				0.2	0	0	0		0		0	0	0	0.19					0	0				0	0	0	0	0.01	0
Vaggatem	Pike	TB81	53.8427	776				0	0	0	0		0		0	0	0	0					0	0				0	0	0	0	0	0
Muddus	DR Whitefish	14MD121	15.6	26.3	2	4	35	0
Muddus	DR Whitefish	14MD141	14.4	22.4	2	4	43	5	2	3
Muddus	DR Whitefish	14MD144	16.5	26.5	1	4	37	0
Paadar	DR Whitefish	14PD7	15.5	25.6	2	4	40	3		2		1
Paadar	DR Whitefish	14PD8	14.7	23.7	1	4	40	5				3	2
Paadar	DR Whitefish	14PD10	16.1	28.1	2	4	40	5				4	1
Inari	DR Whitefish	09ID55	14	22.36	1	4	36	5	0.5	3	1.5
Inari	DR Whitefish	09ID56	16.2	29.28	1	4	36	0
Inari	DR Whitefish	09ID57	13.9	21.08	2	4	36	6		3	3
Vastus	DR Whitefish	14VAD127	14.2	20.2	2	4	35	0
Vastus	DR Whitefish	14VAD128	16.2	26.9	2	4	35	2		2
Vastus	DR Whitefish	14VAD130	16.3	33.3	1	4	35	1		0.5														0.5
Vaggatem	DR Whitefish	TB113	16.2877	29.4			33	0.2	0	0	0.2		0		0	0	0	0					0	0				0	0	0	0	0	0
Vaggatem	DR Whitefish	TB1285	10.7972	9.3			35	8	0	3	2		2		0	0	0	0					0	0				0	0	0	1	0	0
Vaggatem	DR Whitefish	TB1286	11.0168	9.5			31	4	0	0.5	3.5		0		0	0	0	0					0	0				0	0	0	0	0	0
Muddus	LDR Whitefish	14MDL123	30.8	241.4	1	4	37	5					5
Muddus	LDR Whitefish	14MDL125	30.3	253	2	4	35	6		1		5
Muddus	LDR Whitefish	14MDL129	29.9	216.5	1	4	37	5				5
Paadar	LDR Whitefish	14PDL1	31.7	257.2	1	4	37	8					8
Paadar	LDR Whitefish	14PDL4	31.3	259.6	1	4	36	7					7
Paadar	LDR Whitefish	14PDL5	30.7	219.2	1	4	35	5					5
Inari	LDR Whitefish	09IL87	27.7	171.08	2	4	33	0
Inari	LDR Whitefish	09IL91	30.8	264.08	2	4	30	6					6
Inari	LDR Whitefish	09IL98	33.1	328.17	2	4	32	5		1	4
Ukonjärvi	LDR Whitefish	14UDL1	37.8	434.5	1	4	33	6	1	1	4
Ukonjärvi	LDR Whitefish	14UDL3	36.3	382.4	1	4	34	0
Ukonjärvi	LDR Whitefish	14UDL9	32.7	235.9	2	3	36	2	1	1
Vaggatem	LDR Whitefish		30.6728	250			28	5	0	0.5	3		0		0.5	0	0	0					0	0.5				0	0.1	0.4	0	0	0
Vaggatem	LDR Whitefish		28.6962	179			33	0.5	0.1	0	0.1		0		0	0	0	0					0	0				0.3	0	0	0	0	0
Vaggatem	LDR Whitefish		28.1471	193			36	8	0	0	0		8		0	0	0	0					0	0				0	0	0	0	0	0
								68.5	2.1	4.5	11.1	10	39	0	0.5	0	0	0	0	0	0	0	0	0.5	0	0	0	0.3	0.1	0.4	0	0	0
Muddus	LSR Whitefish	14ML121	30.5	252.7	1	4	23	0
Muddus	LSR Whitefish	14ML128	26.7	161	1	4	24	2							2
Muddus	LSR Whitefish	14ML129	34.1	306.7	2	4	25	4						4
Paadar	LSR Whitefish	14PL1	39.8	517.3	1	4	22	0
Paadar	LSR Whitefish	14PL2	41.8	620.1	2	4	25	0
Paadar	LSR Whitefish	14PL3	37.7	431.4	2	4	24	0
Inari	LSR Whitefish	09IL104	35.5	456.55	2	4	22	0
Inari	LSR Whitefish	09IL106	34	455.2	2	4	20	0
Inari	LSR Whitefish	09IL108	36.2	466.1	2	4	22	0
Vastus	LSR Whitefish	14VAL127	34.8	384.9	2	4	22	0
Vastus	LSR Whitefish	14VAL128	31.4	268.8	1	4	21	0
Vastus	LSR Whitefish	14VAL130	40.7	505.3	1	4	24	0
Ukonjärvi	LSR Whitefish	14UL1	40.1	638	1	3	21	7															7
Ukonjärvi	LSR Whitefish	14UL2	40.8	581.1	1	3	19	0
Ukonjärvi	LSR Whitefish	14UL3	39	519.5	2	4	20	8															8
Vaggatem	LSR Whitefish	1151	31.9905	300			20	7	0	0	0		0		0	0	0	0					0	0				0	0	0	0	1.5	5.5
Vaggatem	LSR Whitefish	1152	38.9085	494			27	6	0	0	0		0		0	0	0	0					0	0				0	0	0	0	5.9	0.1
Vaggatem	LSR Whitefish	1154	36.1633	391			26	0.1	0	0	0		0		0	0	0	0					0	0.1				0	0	0	0	0	0
Muddus	SSR Whitefish	14MS121	22.8	93.6	2	4	17	5							1	4
Muddus	SSR Whitefish	14MS122	23.5	112.8	1	4	18	5							4	1
Muddus	SSR Whitefish	14MS123	24.1	111.4	2	4	18	3							2.7	0.3
Paadar	SSR Whitefish	14PS2	27	162.1	2	4	19	3							2	1
Paadar	SSR Whitefish	14PS9	18.9	48.8	2	2	18	6							4	2
Paadar	SSR Whitefish	14PS10	20.6	64.4	2	4	18	5							1	2	2
Inari	SSR Whitefish	14IS8	24.6	93	2	4	14	0
Inari	SSR Whitefish	14IS9	25	95.6	2	4	17	6						5		1
Inari	SSR Whitefish	14IS10	26.5	126.4	2	4	18	2							1		1
Vaggatem	SSR Whitefish	1252	25.4019	118			21	7	0	0	0		0.5		2	3	1	0					0	0				0.5	0	0	0	0	0
Vaggatem	SSR Whitefish	1253	23.5351	116			19	6	0	0	0		1		3	2	0	0					0	0				0	0	0	0	0	0
Vaggatem	SSR Whitefish	1259	26.3902	192			20	5	0	0	0		0		1	4	0	0					0	0				0	0	0	0	0	0
Inari	Vendace	09IV88	12.3	12.09	1	4	43	5		5
Inari	Vendace	09IV89	12.6	13.14	2	4	44	4		4
Inari	Vendace	09IV90	12.8	16.14	1	4	41	5		5
Ukonjärvi	Vendace	14UV1	15.9	26.2	2	4	45	6	2	4
Ukonjärvi	Vendace	14UV2	14.7	19.5	1	3	43	7	3	4
Ukonjärvi	Vendace	14UV3	16.2	27.8	1	4	41	3	1	2
Vaggatem	Vendace	114	14.8601	20.9			41	6	0	2	4		0		0	0	0	0					0	0				0	0	0	0	0	0
Vaggatem	Vendace	115	14.0915	19.7			44	9	0	5	3.5		0		0	0	0	0					0	0				0	0	0	0.5	0	0
Vaggatem	Vendace	117	14.0915	16.8			48	8	0.5	1.5	6		0		0	0	0	0					0	0				0	0	0	0	0	0
Percentage Totals All Lakes
	BT	Pike	DR	LDR	LSR	SSR	Vendace
Calanoida	0	0	5.65611	3.06569	0	0	12.2642
Bosmina	0	0	38.4615	6.56934	0	0	61.3208
Daphnia	0	0	23.0769	16.2044	0	0	25.4717
Copepoda	0	0	18.0995	14.5985	0	0	0
Surface insects	0	0	11.3122	56.9343	0	2.83019	0
Eurycercus	0	0	0	0	11.7302	9.43396	0
Chironomid larvae	0	0	0	0.729927	5.8651	40.9434	0
Pisidium	0	0	0	0	0	38.3019	0
Megacyclops	0	0	0	0	0	7.54717	0
Unidentified fish	4.65116	7.83784	0	0	0	0	0
LSR whitefish	18.6047	34.398	0	0	0	0	0
Whitefish unidentified	12.3256	4.914	0	0	0	0	0
DR whitefish	27.2093	7.37101	0	0	0	0	0
Vendace	26.7442	0	0	0	0	0	0
9-spined stickleback	5.81395	6.14251	0	0	43.9883	0	0
Trichoptera	4.65116	0	1.13122	0.729927	0.293255	0	0
SSR whitefish	0	17.199	0	0	0	0	0
Burbot	0	14.742	0	0	0	0	0
Perch	0	7.37101	0	0	0	0	0
Ostracoda		0	0	0.4	0	0.9	0
Hydracarina		0	0	0.1	0	0	0
Holopedium		0	0	0.6	0	0	0
Cyclopoida		0	2.3	0	0	0	0.9
Asellus		0	0	0	21.7	0	0
Valvata/Planorbis		0	0	0	16.4	0	0
	100	100	100	100	100	100	100
